# Supplementary material for: A transcriptomic atlas of aged human microglia
Source: PubMed Central journal article supplement (PMC5803269; doi:10.1038/s41467-018-02926-5), 2018-02-07
Supplement: 41467_2018_2926_MOESM2_ESM.pdf [file 41467_2018_2926_MOESM2_ESM.pdf]

## Description of Additional Supplementary Files

### File Name: Supplementary Data 1

**Description: The HuMi\_Aged geneset.** Identification of a microglia enriched gene set (HuMi\_Aged) in the aged human brain. Genes that are preferentially expressed in microglia in the aged human brain were identified based on a four fold higher expression in the microglia RNA-Seq data (N=10) when compared to the bulk (dorsolateral prefrontal cortex, DLPFC) RNA-Seq expression (N=540).

### File Name: Supplementary Data 2

**Description: Meta-feature analysis of trait association.** A meta-feature was constructed for the HuMi\_Aged gene set. Subsequently we investigated the relationship of this meta-feature to the clinicopathological traits associated with aging and Alzheimer's disease in the bulk tissue level (DLPFC) data (N=540).

### File Name: Supplementary Data 3

**Description: Meta-feature analysis of trait association after stratification based on clinical AD diagnosis.** A meta-feature was constructed for the HuMi\_Aged gene set. Subsequently we investigated the relationship of this meta-feature to the clinicopathological traits associated with aging and Alzheimer's disease in the bulk tissue level (DLPFC) data (N=540) in donors with (cAD=1) and without (cAD=0) the clinical diagnosis of AD, separately.

### File Name: Supplementary Data 4

**Description: Differential gene expression analysis between middle aged and aged human microglia.** The genes affected by aging were identified by contrasting the gene expression levels between middle aged (microglia RNA-Seq dataset from Zhang et al.; mean age=53, SEM= $\pm 5.29$ , N=3) and aged human microglia (present study; mean age=94.07, SD= $\pm 0.95$ , N=10).

### File Name: Supplementary Data 5

**Description: The proteome of aged human microglia.** A list of LC-MS detected microglia proteins and their relative abundance.
